# Supplementary material
Source: publisher figshare collection journal article supplement (https://diabetesjournals.figshare.com/articles/dataset/_/20060318)
Supplement: Supplementary file 1 [file 35877245]

**Supplementary Table 1. Baseline characteristics of the randomly selected subcohort (Japan, n = 658), by fat-distribution cluster**

|                                      | <b>Cluster 1</b>    | <b>Cluster 2</b>     | <b>Cluster 3</b>    | <b>Cluster 4</b>    | <b>P-value</b> |
|--------------------------------------|---------------------|----------------------|---------------------|---------------------|----------------|
|                                      | Hepatic steatosis   | Pancreatic steatosis | Trunk myosteatorsis | Steatopenia         |                |
|                                      | (n = 118)           | (n = 62)             | (n = 224)           | (n = 254)           |                |
| Age (years)                          | 50 (43-57)          | 61 (55-64)           | 56 (50-60)          | 45 (40-53)          | < 0.001        |
| Male, n (%)                          | 92 (78.0)           | 49 (79.0)            | 160 (71.4)          | 183 (72.0)          | 0.42           |
| Body mass index (kg/m <sup>2</sup> ) | 26.6 (24.7-29.0)    | 26.1 (24.3-27.6)     | 23.5 (22.1-25.4)    | 22.3 (20.6-23.9)    | < 0.001        |
| Height (cm)                          | 167.0 (160.9-171.0) | 165.5 (159.5-170.4)  | 166.3 (160.4-170.9) | 167.4 (161.2-172.7) | 0.17           |
| Weight (kg)                          | 75.1 (67.6-83.9)    | 71.7 (64.9-77.9)     | 65.1 (56.8-72.5)    | 63.2 (54.1-70.0)    | <0.001         |
| Waist circumference (cm)             | 92.4 (87.0-98.5)    | 92.5 (88.5-96.5)     | 85.7 (82.0-90.5)    | 80.6 (75.9-85.0)    | <0.001         |
| Liver fat (HU)                       | 51.6 (43.3-56.8)    | 61.4 (55.0-66.3)     | 65.6 (62.7-68.4)    | 67.2 (64.3-70.9)    | < 0.001        |
| Pancreas fat (HU)                    | 46.3 (41.5-49.5)    | 26.8 (18.5-33.0)     | 47.2 (43.2-50.1)    | 52.1 (49.7-54.6)    | < 0.001        |
| Muscle fat (HU)                      | 40.7 (37.4-43.3)    | 34.1 (30.2-37.4)     | 36.8 (33.7-39.5)    | 45.3 (42.8-47.8)    | < 0.001        |
| Visceral fat (cm <sup>2</sup> )      | 171.0 (123.5-217.6) | 167.1 (118.9-215.0)  | 96.8 (53.4-140.1)   | 42.7 (16.2-87.8)    | < 0.001        |
| Muscle area (cm <sup>2</sup> )       | 160.7 (139.0-173.2) | 148.3 (123.3-161.5)  | 138.4 (105.5-155.9) | 140.8 (108.9-161.1) | < 0.001        |
| Fasting plasma glucose (mg/dL)       | 93.0 (87.0-101.0)   | 94.5 (90.0-98.0)     | 91.0 (86.5-96.0)    | 88.0 (81.0-93.0)    | < 0.001        |
| Fasting plasma glucose (mmol/L)      | 5.2 (4.8-5.6)       | 5.3 (5.0-5.4)        | 5.1 (4.8-5.3)       | 4.9 (4.5-5.2)       | < 0.001        |
| HbA1c (%)                            | 5.4 (5.2-5.6)       | 5.4 (5.3-5.6)        | 5.3 (5.1-5.5)       | 5.2 (5.0-5.4)       | < 0.001        |
| HbA1c (mmol/mol)                     | 36 (33-38)          | 36 (34-38)           | 34 (32-37)          | 33 (31-36)          | < 0.001        |
| Triglycerides (mg/dL)                | 134.0 (98.0-189.0)  | 121.5 (86.0-172.0)   | 88.0 (66.0-121.5)   | 79.5 (56.0-115.0)   | < 0.001        |
| HDL cholesterol (mg/dL)              | 51.0 (44.0-59.0)    | 51.0 (45.0-62.0)     | 57.0 (48.5-68.0)    | 59.0 (48.0-69.0)    | < 0.001        |
| LDL cholesterol (mg/dL)              | 125.5 (109.0-144.0) | 129.0 (109.0-153.0)  | 125.0 (105.0-142.0) | 115.0 (96.0-135.0)  | < 0.001        |
| Systolic blood pressure (mmHg)       | 124.0 (118.0-132.0) | 120.0 (114.0-132.0)  | 120.0 (110.0-130.0) | 112.0 (104.0-124.0) | < 0.001        |
| Diastolic blood pressure (mmHg)      | 80.0 (74.0-86.0)    | 79.0 (70.0-84.0)     | 78.0 (70.0-84.0)    | 72.0 (68.0-80.0)    | < 0.001        |
| Current smoker, n (%)                | 36 (30.5)           | 11 (17.7)            | 59 (26.3)           | 90 (35.4)           | 0.023          |
| Alcohol intake, n (%)                | 35 (29.7)           | 16 (25.8)            | 89 (39.7)           | 86 (33.9)           | 0.11           |
| Physical activity, n (%)             | 15 (12.7)           | 16 (25.8)            | 51 (22.9)           | 56 (22.0)           | 0.077          |

|                                   |           |           |           |           |         |
|-----------------------------------|-----------|-----------|-----------|-----------|---------|
| Family history of diabetes, n (%) | 23 (19.5) | 16 (25.8) | 39 (17.4) | 56 (22.0) | 0.40    |
| Antihypertensive drug, n (%)      | 28 (23.7) | 16 (25.8) | 42 (18.8) | 13 (5.1)  | < 0.001 |
| Lipid-lowering drug, n (%)        | 26 (22.0) | 9 (14.5)  | 30 (13.4) | 11 (4.3)  | < 0.001 |

Continuous data are expressed as medians and interquartile ranges. Fisher's exact test was used for categorical data. The Kruskal-Wallis test was used for continuous data. We regarded participants who met all of the following criteria as “physically active”: length of each physical-exercise session  $\geq 30$  minutes, frequency of physical exercise  $\geq 2$  times a week, and duration of physical exercise  $\geq 1$  year. Missing data: waist circumference (n = 3), LDL-cholesterol (n = 2), physical activity (n = 1)

HU, Hounsfield unit

**Supplementary Table 2. Baseline characteristics of the cohort in Germany (n = 319), by fat-distribution cluster**

|                                      | <b>Cluster 1</b><br>Hepatic steatosis<br>(n = 39) | <b>Cluster 2</b><br>Pancreatic steatosis<br>(n = 21) | <b>Cluster 3</b><br>Trunk myosteatosi<br>(n = 103) | <b>Cluster 4</b><br>Steatopenia<br>(n = 156) | <b>P-value</b> |
|--------------------------------------|---------------------------------------------------|------------------------------------------------------|----------------------------------------------------|----------------------------------------------|----------------|
| Age (years)                          | 55 (40-62)                                        | 56 (49-64)                                           | 58 (43-65)                                         | 36 (29-44)                                   | < 0.001        |
| Male, n (%)                          | 8 (20.5)                                          | 8 (38.1)                                             | 29 (28.2)                                          | 42 (26.9)                                    | 0.53           |
| Body mass index (kg/m <sup>2</sup> ) | 32.4 (29.7-35.2)                                  | 34.0 (29.7-39.7)                                     | 29.4 (25.9-32.7)                                   | 23.1 (21.1-26.5)                             | < 0.001        |
| Height (cm)                          | 164.8 (160.0-172.0)                               | 170.0 (164.0-176.0)                                  | 168.0 (164.0-174.8)                                | 168.0 (164.0-175.5)                          | 0.16           |
| Weight (kg)                          | 88.9 (78.7-109.1)                                 | 105.5 (85.8-113.5)                                   | 82.4 (72.6-94.9)                                   | 67.5 (60.5-78.3)                             | <0.001         |
| Waist circumference (cm)             | 99.0 (93.5-114.0)                                 | 113.5 (98.5-118.0)                                   | 96.0 (87.5-104.0)                                  | 78.0 (73.0-86.0)                             | <0.001         |
| Liver fat (%)                        | 13.8 (10.9-19.2)                                  | 6.1 (3.2-7.2)                                        | 3.0 (1.6-5.2)                                      | 0.9 (0.6-2.0)                                | < 0.001        |
| Pancreas fat (%)                     | 6.4 (3.9-8.7)                                     | 17.4 (15.0-20.3)                                     | 4.3 (3.2-7.2)                                      | 2.2 (1.5-3.1)                                | < 0.001        |
| Muscle fat (%)                       | 8.1 (6.4-9.3)                                     | 9.0 (8.3-9.7)                                        | 8.4 (7.6-9.3)                                      | 5.9 (5.1-6.8)                                | < 0.001        |
| Visceral fat (L)                     | 4.6 (4.2-5.6)                                     | 6.5 (4.8-7.3)                                        | 3.7 (2.9-4.8)                                      | 1.6 (1.0-2.1)                                | < 0.001        |
| Muscle area (cm <sup>2</sup> )       | 140.2 (128.4-168.1)                               | 145.5 (131.6-206.7)                                  | 138.5 (122.8-161.0)                                | 129.8 (121.8-148.8)                          | 0.015          |
| Fasting plasma glucose (mg/dL)       | 93.6 (91.8-100.8)                                 | 95.4 (91.8-100.8)                                    | 95.4 (90.0-100.8)                                  | 86.4 (82.8-91.8)                             | < 0.001        |
| Fasting plasma glucose (mmol/L)      | 5.2 (5.1-5.6)                                     | 5.3 (5.1-5.6)                                        | 5.3 (5.0-5.6)                                      | 4.8 (4.6-5.1)                                | < 0.001        |
| HbA1c (%)                            | 5.7 (5.3-6.0)                                     | 5.6 (5.3-6.0)                                        | 5.7 (5.4-5.9)                                      | 5.4 (5.2-5.6)                                | < 0.001        |
| HbA1c (mmol/mol)                     | 39 (34-42)                                        | 38 (34-42)                                           | 39 (36-41)                                         | 36 (33-38)                                   | < 0.001        |
| Triglycerides (mg/dL)                | 117.0 (92.0-161.0)                                | 123.0 (96.0-155.0)                                   | 98.0 (77.0-136.0)                                  | 72.0 (56.0-97.5)                             | < 0.001        |
| HDL cholesterol (mg/dL)              | 48.0 (41.0-58.0)                                  | 53.0 (47.0-58.0)                                     | 54.0 (45.0-67.0)                                   | 55.5 (48.0-69.5)                             | 0.002          |
| LDL cholesterol (mg/dL)              | 124.0 (105.0-158.0)                               | 145.0 (120.0-163.0)                                  | 125.0 (108.0-157.0)                                | 104.5 (90.0-125.0)                           | < 0.001        |
| Systolic blood pressure (mmHg)       | 136.0 (125.0-151.0)                               | 141.0 (135.0-145.0)                                  | 134.0 (124.0-144.0)                                | 124.0 (115.0-134.0)                          | < 0.001        |
| Diastolic blood pressure (mmHg)      | 89.0 (82.0-101.0)                                 | 90.0 (86.0-97.0)                                     | 86.0 (80.0-95.0)                                   | 82.0 (74.0-90.0)                             | < 0.001        |
| Current smoker, n (%)                | 4 (10.5)                                          | 0 (0.0)                                              | 5 (5.2)                                            | 13 (8.7)                                     | 0.39           |
| Alcohol intake, n (%)                | 3 (7.9)                                           | 4 (19.0)                                             | 4 (4.1)                                            | 3 (2.0)                                      | 0.007          |
| Habitual physical activity score*    | 8.2 (7.0-9.0)                                     | 7.8 (6.9-8.4)                                        | 8.5 (7.1-9.4)                                      | 8.1 (7.3-9.0)                                | 0.25           |

|                                   |           |           |           |           |      |
|-----------------------------------|-----------|-----------|-----------|-----------|------|
| Family history of diabetes, n (%) | 25 (64.1) | 14 (66.7) | 62 (60.2) | 79 (50.6) | 0.21 |
| Antihypertensive drug, n (%)      | 2 (5.1)   | 2 (9.5)   | 7 (6.8)   | 7 (4.5)   | 0.59 |
| Lipid-lowering drug, n (%)        | 0 (0.0)   | 0 (0.0)   | 3 (2.9)   | 4 (2.6)   | 0.85 |

Continuous data are expressed as medians and interquartile ranges. Fisher's exact test was used for categorical data. The Kruskal-Wallis test was used for continuous data.

Missing data: muscle volume (n = 9), systolic blood pressure (n = 1), diastolic blood pressure (n = 1), current smoker (n = 14), alcohol intake (n = 13), habitual physical activity score (n = 17)

\* J A Baecke, J Burema, J E Frijters. A short questionnaire for the measurement of habitual physical activity in epidemiological studies. Am J Clin Nutr. 1982;36(5):936-42.

**Supplementary Table 3. Hazard ratios and 95% confidence intervals for pairwise comparisons: the association between membership in a fat-distribution cluster at baseline and the incidence of diabetes mellitus, from the case-cohort study in Japan (n = 754)**

| <b>HRs (95% CIs), P-values</b> | <b>Cluster 1 vs Cluster 3*</b> | <b>Cluster 2 vs Cluster 3*</b> | <b>Cluster 1 vs Cluster 2*</b> |
|--------------------------------|--------------------------------|--------------------------------|--------------------------------|
| Unadjusted analysis            | 2.33 (1.49-3.64), < 0.001      | 2.19 (1.24-3.87), 0.007        | 1.07 (0.61-1.87), 0.82         |
| Age-and-sex-adjusted analysis  | 2.60 (1.61-4.21), < 0.001      | 1.89 (1.05-3.39), 0.033        | 1.38 (0.75-2.52), 0.30         |
| Multivariable-adjusted model 1 | 2.06 (1.26-3.39), 0.004        | 1.73 (0.96-3.13), 0.067        | 1.19 (0.65-2.19), 0.58         |
| Multivariable-adjusted model 2 | 1.83 (1.08-3.10), 0.024        | 1.51 (0.80-2.83), 0.20         | 1.22 (0.66-2.25), 0.53         |
| Multivariable-adjusted model 3 | 1.96 (1.11-3.44), 0.020        | 1.52 (0.80-2.90), 0.20         | 1.28 (0.67-2.46), 0.45         |

\*The reference cluster for each comparison.

Cluster 1: Hepatic steatosis, Cluster 2: Pancreatic steatosis, Cluster 3: Trunk myosteatorsis

Pairwise comparisons in addition to table 2 in the main manuscript are shown.

Weighted Cox regression analyses were conducted to estimate the hazard ratios, 95% confidence intervals, and P-values.

Model 1: Adjusted for age, sex, alcohol intake, current smoking, and muscle area

Model 2: Adjusted for age, sex, alcohol intake, current smoking, muscle area, and body mass index

Model 3: Adjusted for age, sex, alcohol intake, current smoking, muscle area, body mass index, systolic blood pressure, diastolic blood pressure, triglycerides, HDL-cholesterol, LDL-cholesterol, antihypertensive drugs, and lipid-lowering drugs

**Supplementary Table 4. Pairwise interactions of fat compartments regarding type-2 diabetes risk (Japan, n = 754)**

| <b>HR (95% CI), P-value</b> | <b>Visceral fat (per 1 SD)</b>                                                                                           | <b>Liver fat (per 1 SD)</b>                                                                                             | <b>Pancreas fat (per 1 SD)</b>                                                                                         |
|-----------------------------|--------------------------------------------------------------------------------------------------------------------------|-------------------------------------------------------------------------------------------------------------------------|------------------------------------------------------------------------------------------------------------------------|
| Liver fat (per 1 SD)        | Visceral fat: 1.76 (1.46-2.13), < 0.001<br>Liver fat: 1.53 (1.23-1.91), < 0.001<br>Interaction: 0.90 (0.78-1.04), 0.17   |                                                                                                                         |                                                                                                                        |
| Pancreas fat (per 1 SD)     | Visceral fat: 1.98 (1.65-2.39), < 0.001<br>Pancreas fat: 1.48 (1.18-1.86), 0.001<br>Interaction: 0.79 (0.67-0.93), 0.004 | Liver fat: 1.69 (1.48-1.92), < 0.001<br>Pancreas fat: 1.36 (1.16-1.59), < 0.001<br>Interaction: 0.88 (0.78-1.00), 0.055 |                                                                                                                        |
| Muscle fat (per 1 SD)       | Visceral fat: 1.99 (1.69-2.35), < 0.001<br>Muscle fat: 1.23 (1.02-1.48), 0.029<br>Interaction: 0.93 (0.82-1.06), 0.26    | Liver fat: 1.68 (1.47-1.92), < 0.001<br>Muscle fat: 1.27 (1.07-1.50), 0.006<br>Interaction: 1.02 (0.90-1.17), 0.71      | Pancreas fat: 1.48 (1.29-1.69), < 0.001<br>Muscle fat: 1.23 (1.03-1.47), 0.020<br>Interaction: 0.77 (0.66-0.90), 0.001 |

Weighted Cox regression analyses were conducted to estimate the hazard ratios, 95% confidence intervals, and P-values for the association of fat deposits with incident type-2 diabetes.

Visceral fat area, liver attenuation, pancreas attenuation, and muscle attenuation were used as fat variables.

Liver attenuation, pancreas attenuation, and muscle attenuation were “flipped” such that higher value would correspond to more fat.

Each fat variable was standardized (mean = 0, SD = 1) and analyzed as a continuous variable.

Mean (1 SD): 100.7 (70.3) cm<sup>2</sup> for visceral fat, 62.8 (9.3) HU for liver fat, 46.1 (10.5) HU for pancreas fat, and 40.2 (6.3) HU for muscle fat.

SD, standard deviation; HR, hazard ratio; CI, confidence interval; HU, Hounsfield unit

**Supplementary Table 5. P-values for pairwise comparisons: glycemia, insulin sensitivity, and insulin secretion based on results of 75g oral glucose tolerance tests, across fat-distribution clusters in Germany (n = 319)**

| <b>P-values</b>                        | <b>Cluster 1 vs Cluster 3</b> | <b>Cluster 2 vs Cluster 3</b> | <b>Cluster 1 vs Cluster 2</b> |
|----------------------------------------|-------------------------------|-------------------------------|-------------------------------|
| Glycemia                               | 0.022                         | 0.55                          | 0.27                          |
| Insulin sensitivity                    | < 0.001                       | 0.087                         | 0.016                         |
| Insulin secretion                      | < 0.001                       | 0.79                          | 0.010                         |
| Sensitivity-adjusted insulin secretion | 0.15                          | 0.49                          | 0.091                         |

Cluster 1: Hepatic steatosis, Cluster 2: Pancreatic steatosis, Cluster 3: Trunk myosteatosis

Pairwise comparisons in addition to table 3 in the main manuscript are shown.

P-values were calculated from Wilcoxon's rank-sum tests.



**Supplementary Table 6. Pairwise interactions of fat compartments regarding glycemia (Germany, n = 319)**

| <b>β (95% CI), P-value</b> | <b>Visceral fat (per 1 SD)</b>                                                                                                   | <b>Liver fat (per 1 SD)</b>                                                                                                  | <b>Pancreas fat (per 1 SD)</b>                                                                                               |
|----------------------------|----------------------------------------------------------------------------------------------------------------------------------|------------------------------------------------------------------------------------------------------------------------------|------------------------------------------------------------------------------------------------------------------------------|
| Liver fat (per 1 SD)       | Visceral fat: 83.3 (58.6-108.0), < 0.001<br>Liver fat: 54.0 (25.7-82.3), < 0.001<br>Interaction: -23.6 (-40.0- -7.16), 0.005     |                                                                                                                              |                                                                                                                              |
| Pancreas fat (per 1 SD)    | Visceral fat: 100.1 (76.7-123.5), < 0.001<br>Pancreas fat: 31.7 (4.53-58.8), 0.022<br>Interaction: -34.7 (-53.6- -15.7), < 0.001 | Liver fat: 77.5 (54.8-100.1), < 0.001<br>Pancreas fat: 44.0 (20.7-67.3), < 0.001<br>Interaction: -23.4 (-41.0- -5.92), 0.009 |                                                                                                                              |
| Muscle fat (per 1 SD)      | Visceral fat: 95.0 (71.8-118.1), < 0.001<br>Muscle fat: 23.6 (0.93-46.3), 0.041<br>Interaction: -30.6 (-51.8- -9.35), 0.005      | Liver fat: 70.5 (49.3-91.6), < 0.001<br>Muscle fat: 51.0 (30.0-72.0), < 0.001<br>Interaction: -9.83 (-30.0-10.4), 0.34       | Pancreas fat: 65.4 (35.1-95.7), < 0.001<br>Muscle fat: 44.7 (20.5-68.9), < 0.001<br>Interaction: -36.4 (-58.7- -14.1), 0.001 |

Glycemia was evaluated by AUC Glucose<sub>0-120</sub> from a 75 g oral glucose tolerance test, and the unit is mmol\*min/ml.

Multiple linear regression models were used to estimate β, 95% CI, and P-values for the associations of fat deposits with glycemia.

Each fat variable was standardized (mean = 0, SD = 1) and analyzed as a continuous variable.

Mean (1 SD): 3.1 (2.1) L for visceral fat, 4.3 (5.2) % for liver fat, 5.0 (4.8) % for pancreas fat, 7.1 (1.7) % for muscle fat, and 894.9 (207.1) mmol\*min/ml for the AUC Glucose<sub>0-120</sub>.

SD, standard deviation; CI, confidence interval; AUC, area under the curve

**Supplementary Table 7. Regression coefficients ( $\beta$ ) and 95% confidence intervals for the associations of fat deposits with insulin sensitivity, insulin secretion, and aerobic capacity (Germany, n = 319)**

|                         | <b>Insulin sensitivity</b>                  | <b>Insulin secretion</b>                    | <b>Adjusted insulin secretion</b>           | <b>Aerobic capacity</b>                     |
|-------------------------|---------------------------------------------|---------------------------------------------|---------------------------------------------|---------------------------------------------|
|                         | <b><math>\beta</math> (95% CI), P-value</b> |
| Visceral fat (per 1SD)  | -1.29 (-1.47- -1.10), < 0.001               | 16.5 (9.72-23.2), < 0.001                   | -5.83 (-11.7-0.038), 0.052                  | -2.02 (-3.06- -0.98), < 0.001               |
| Liver fat (per 1 SD)    | -1.19 (-1.38- -1.00), < 0.001               | 21.9 (15.4-28.4), < 0.001                   | -0.25 (-6.08- 5.58), 0.93                   | -2.25 (-3.56- -0.95), 0.001                 |
| Pancreas fat (per 1 SD) | -0.74 (-0.95- -0.52), < 0.001               | 4.92 (-2.00-11.8), 0.16                     | -7.18 (-13.0- -1.37), 0.016                 | -1.02 (-2.03- -0.0017), 0.050               |
| Muscle fat (per 1 SD)   | -0.90 (-1.11- -0.70), < 0.001               | 9.41 (2.54-16.3), 0.007                     | -5.22 (-11.1-0.61), 0.079                   | -2.48 (-3.52- -1.44), < 0.001               |

Insulin sensitivity and insulin secretion were assessed by NEFA-ISI and AUC C-peptide<sub>0-30</sub>/AUC Glucose<sub>0-30</sub>, respectively. To estimate insulin secretion adjusted for insulin sensitivity, we calculated AUC C-peptide<sub>0-30</sub>/AUC Glucose<sub>0-30</sub> residuals from regression of AUC C-peptide<sub>0-30</sub>/AUC Glucose<sub>0-30</sub> on NEFA-ISI and its quadratic term. Aerobic capacity was quantified as VO<sub>2</sub> max. Insulin sensitivity and secretion are in arbitrary units, and the unit of VO<sub>2</sub> max is mL/kg/min. Linear regression models were used to estimate  $\beta$ , 95% CI, and P-values. Each fat variable was standardized (mean = 0, SD = 1) and analyzed as a continuous variable.

Mean (1 SD): 3.1 (2.1) L for visceral fat, 4.3 (5.2) % for liver fat, 5.0 (4.8) % for pancreas fat, 7.1 (1.7) % for muscle fat, 4.3 (2.1) for NEFA-ISI, 163.7 (62.8) for the AUC C-peptide<sub>0-30</sub>/AUC Glucose<sub>0-30</sub>, 0 (52.6) for the AUC C-peptide<sub>0-30</sub>/AUC Glucose<sub>0-30</sub> residuals, and 20.1 (6.2) mL/kg/min for the VO<sub>2</sub> max.

Missing data: insulin sensitivity (n = 3), sensitivity-adjusted insulin secretion (n = 7), aerobic capacity (n = 168)

SD, standard deviation; BMI, body mass index; NEFA-ISI, non-esterified fatty acids-based insulin sensitivity index; AUC, area under the curve;

VO2 max, maximal oxygen uptake

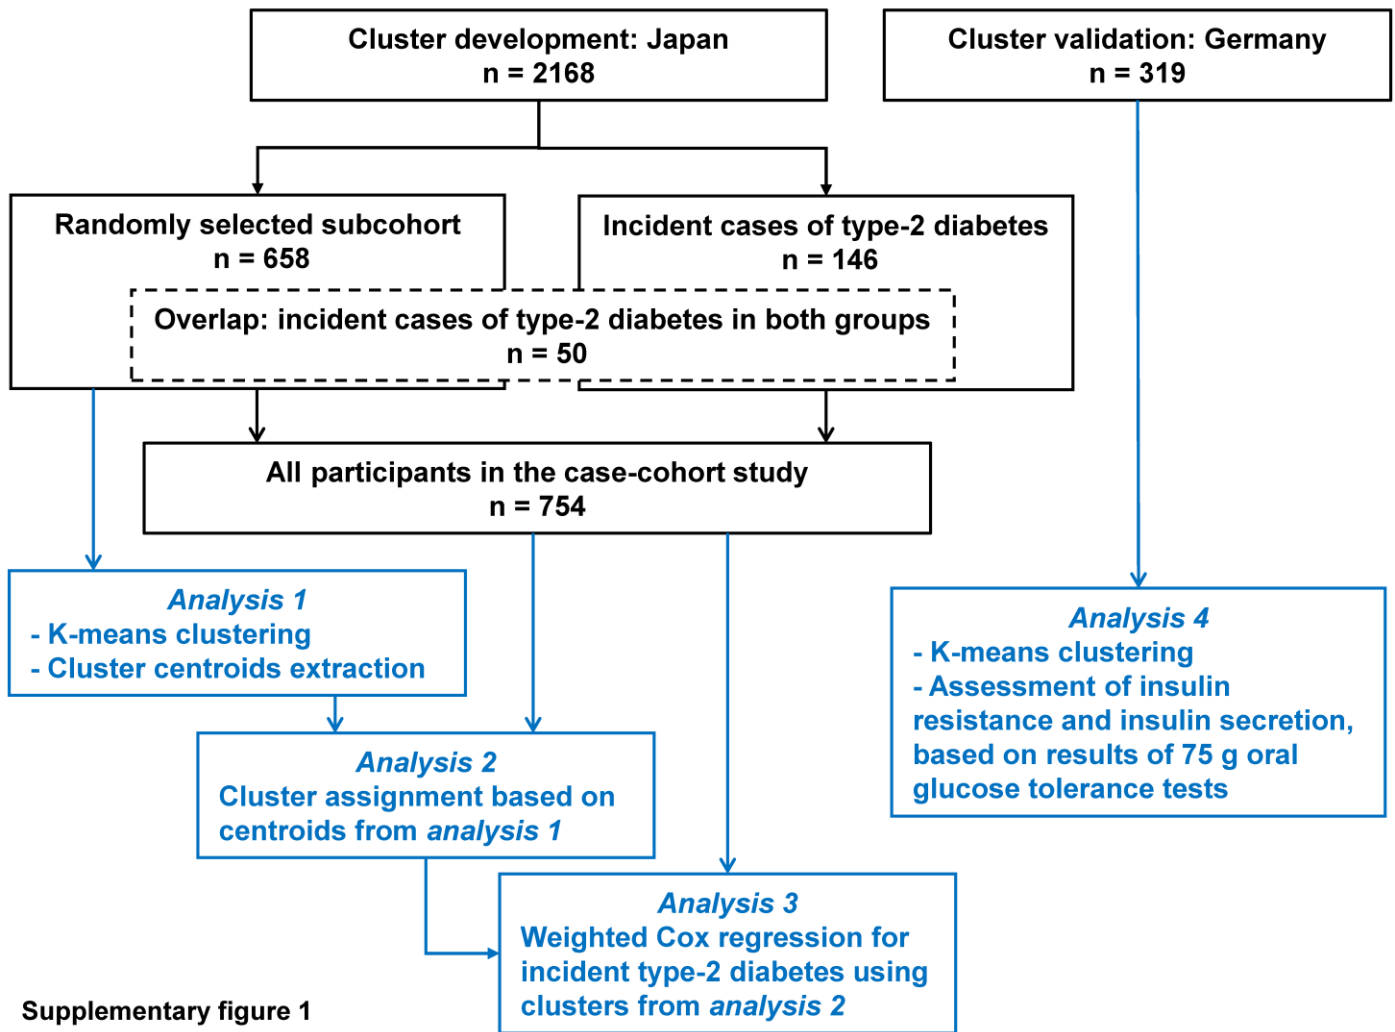

**Supplementary Figure 1. Study flow diagram.**

Incident cases of type-2 diabetes (n = 146) are within and outside of the randomly selected subcohort.

The case-cohort study in Japan comprised 754 participants of whom 658 were in the randomly selected subcohort. There were 146 incident cases of type-2 diabetes, including 50 “overlap” cases.

Analysis 1 was conducted using data from the randomly selected subcohort (Japan, n = 658).

Analysis 2 and analysis 3 were conducted using data from all participants in the case-cohort study (Japan, n = 754).

Analysis 4 was conducted using data from the cohort in Germany (n = 319)

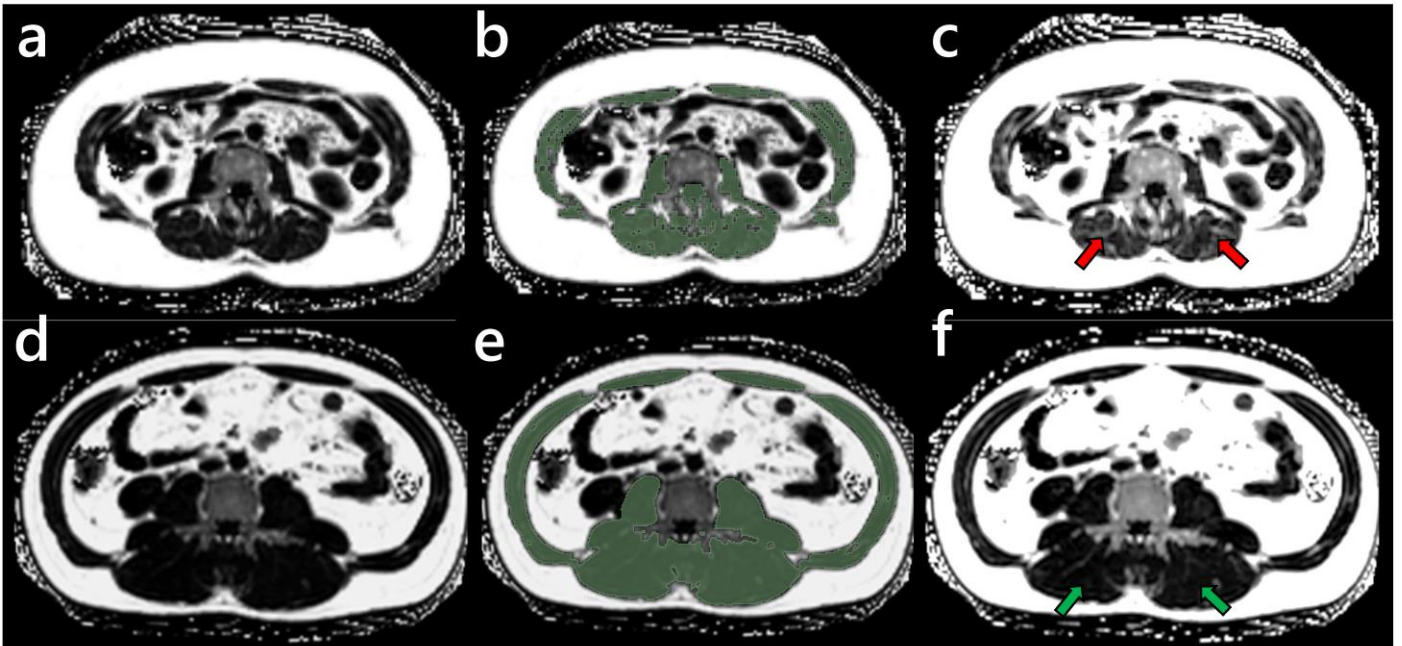

Supplementary figure 2

**Supplementary Figure 2. Axial PDFF images at the level of the L3 lumbar segment.**

PDFF images from a 50-year-old woman (a-c) and a 34-year-old man (d-f) show the muscle area in green (b and e) and muscle fat (c and f) resulting in a mean of 11.7% in the woman and 4.8% in the man.

PDFF, proton density fat fraction

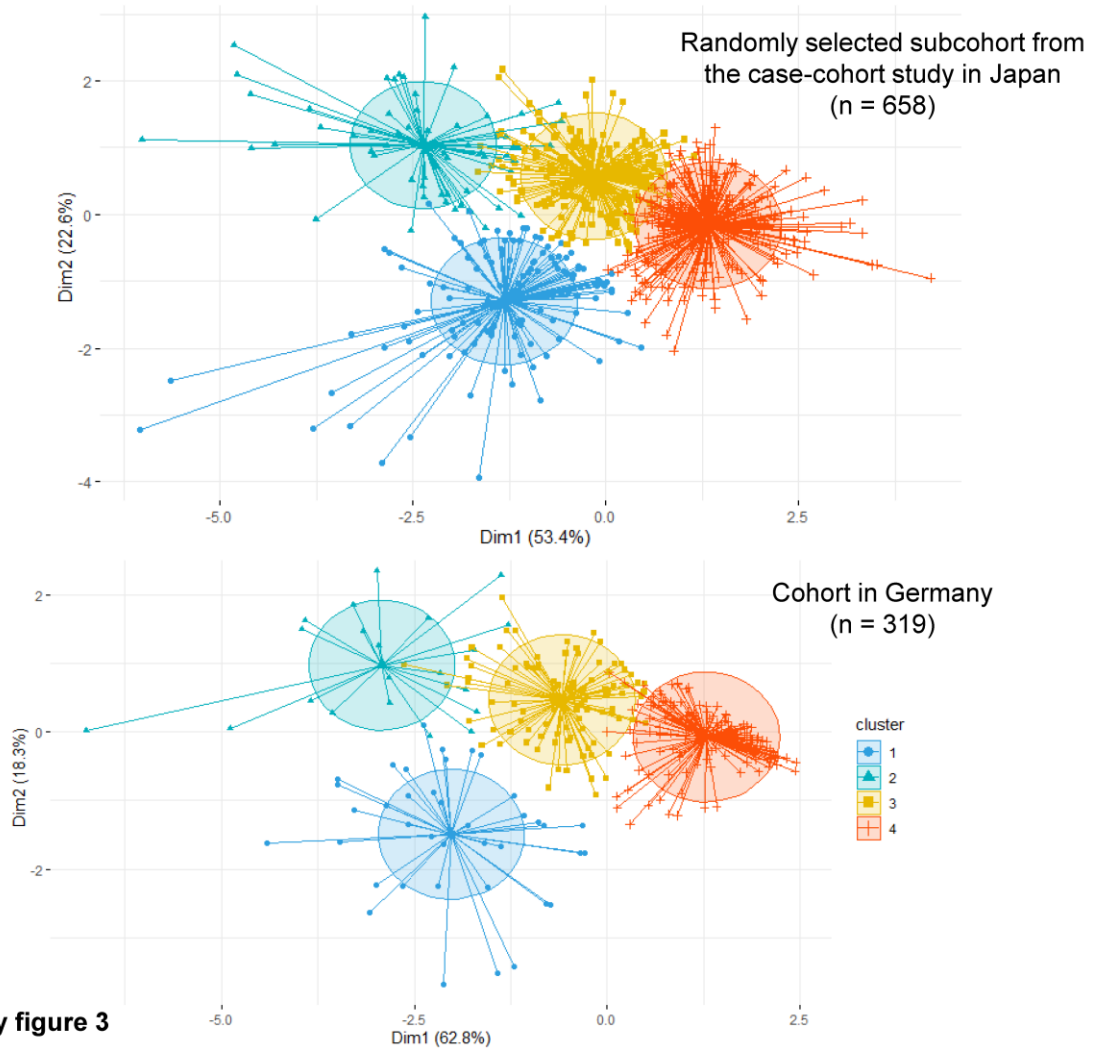

**Supplementary figure 3**

### Supplementary Figure 3. Cluster plots

Four clusters based on k-means clustering are shown in each of the two cluster plots. Principal components analysis was conducted to project data onto the first two principal components. Data variation (%) of the first principal component (Dim1) and the second principal component (Dim2) are shown on the axes.

Cluster 1: Hepatic steatosis, Cluster 2: Pancreatic steatosis, Cluster 3: Trunk myosteatosi s, Cluster 4:

Steatopenia

|                                                          | Cluster 1<br>Hepatic steatosis | Cluster 2<br>Pancreatic steatosis | Cluster 3<br>Trunk myosteatorsis | Cluster 4<br>Steatopenia |
|----------------------------------------------------------|--------------------------------|-----------------------------------|----------------------------------|--------------------------|
| Diabetes risk                                            | ↑ ↑                            | ↑ ↑                               | ↑                                | Reference                |
| Insulin sensitivity                                      | ↓↓↓                            | ↓↓                                | ↓                                | Reference                |
| Insulin secretion<br>adjusted for<br>insulin sensitivity | →                              | ↓                                 | ↓                                | Reference                |

**Supplementary figure 4**

**Supplementary Figure 4. Summary of metabolic characteristics in fat distribution clusters**
